# Supplementary material
Source: MDPI journal article supplement (https://www.mdpi.com/2504-477X/6/4/104)
Supplement: s1 [file s1]

Supplementary information

# Poly(ethyl methacrylate) Composite Coatings Containing Halogen-Free Inorganic Additives with Flame-Retardant Properties

Xinqian Liu <sup>1</sup>, Stephen Veldhuis <sup>2</sup>, Ritch Mathews <sup>3</sup> and Igor Zhitomirsky <sup>1,\*</sup>

<sup>1</sup> Department of Materials Science and Engineering, McMaster University, Hamilton, ON L8S 4L7, Canada; liux234@mcmaster.ca

<sup>2</sup> Department of Mechanical Engineering, McMaster University, Hamilton, ON L8S 4L7, Canada; veldhu@mcmaster.ca

<sup>3</sup> Advanced Ceramics Corporation, 2536 Bristol Circle, Oakville, ON L6H 5S1, Canada; rmathews@acc.ca

\* Correspondence: zhitom@mcmaster.ca

**Citation:** Liu, X.; Veldhuis, S.; Mathews, R.; Zhitomirsky, I. Poly(ethyl methacrylate) composite coatings containing halogen-free inorganic additives with flame-retardant properties. *J. Compos. Sci.* **2022**, *6*, 104. <https://doi.org/10.3390/jcs6040104>

Academic Editor: Francesco Tornabene and Thanasis Triantafyllou

**Publisher's Note:** MDPI stays neutral with regard to jurisdictional claims in published maps and institutional affiliations.

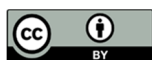

**Copyright:** © 2022 by the authors. Licensee MDPI, Basel, Switzerland. This article is an open access article distributed under the terms and conditions of the Creative Commons Attribution (CC BY) license (<https://creativecommons.org/licenses/by/4.0/>).

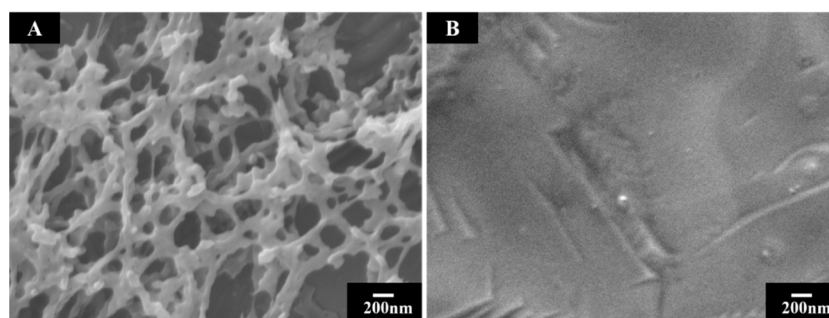

**Figure S1.** SEM images of (A) as-deposited coatings and (B) coatings annealed at 200 °C for 1h, prepared from 10 g L<sup>-1</sup> PEMA solutions.

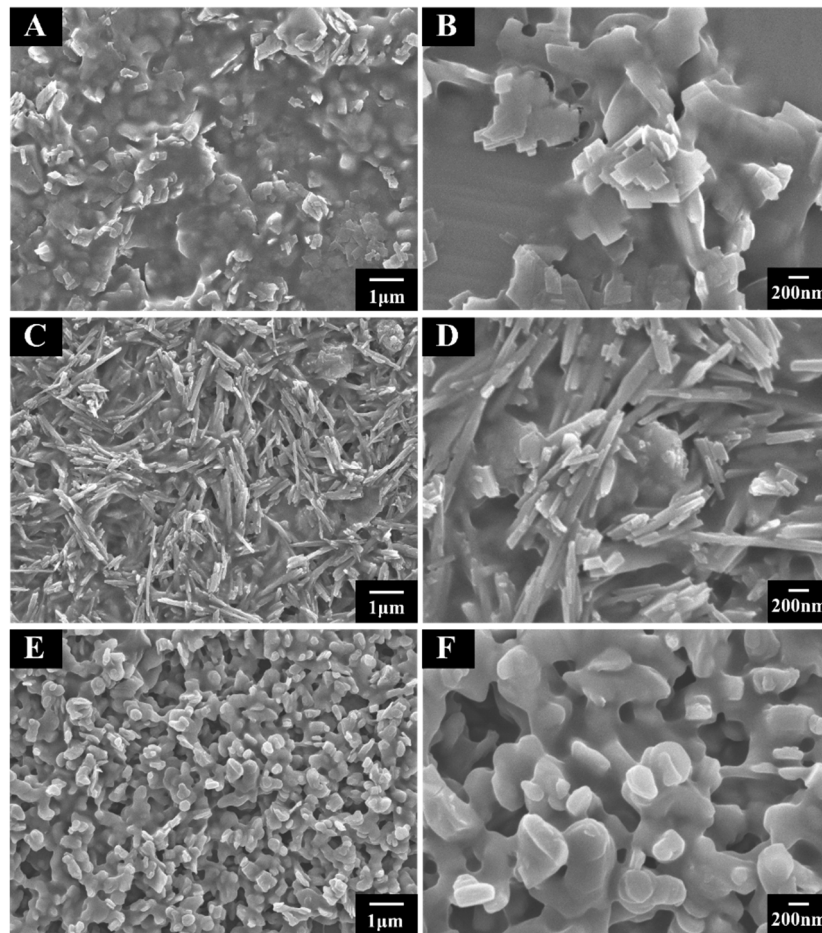

**Figure S2.** SEM images at different magnifications of as-deposited bi-layer composite coatings, containing annealed PEMA bottom layer and PEMA-FRM top layer with (A,B) huntite, (C,D) halloysite, and (E,F) hydrotalcite.
